## CORRECTION

# Correction: What can be learned from lecturers' knowledge and self-efficacy for online teaching during the Covid-19 pandemic to promote online teaching in higher education

The *PLOS ONE* Staff

The ORCID iD is missing for the first author. Please see the author's respective ORCID iD here:

- Author Ron Blonder's ORCID iD is: 0000-0003-4796-4678 (<https://orcid.org/0000-0003-4796-4678>).

The publisher apologizes for the error.

## Reference

1. Blonder R, Feldman-Maggor Y, Rap S (2022) What can be learned from lecturers' knowledge and self-efficacy for online teaching during the Covid-19 pandemic to promote online teaching in higher education. *PLOS ONE* 17(10): e0275459. <https://doi.org/10.1371/journal.pone.0275459> PMID: 36197933

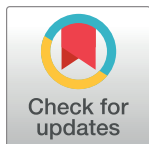

## OPEN ACCESS

**Citation:** The *PLOS ONE* Staff (2024) Correction: What can be learned from lecturers' knowledge and self-efficacy for online teaching during the Covid-19 pandemic to promote online teaching in higher education. *PLoS ONE* 19(11): e0314398. <https://doi.org/10.1371/journal.pone.0314398>

**Published:** November 21, 2024

**Copyright:** © 2024 The PLOS ONE Staff. This is an open access article distributed under the terms of the [Creative Commons Attribution License](https://creativecommons.org/licenses/by/4.0/), which permits unrestricted use, distribution, and reproduction in any medium, provided the original author and source are credited.
